# Supplementary material for: The kidney anion exchanger 1 affects tight junction properties via claudin-4
Source: PubMed Central journal article supplement (PMC6395713; doi:10.1038/s41598-019-39430-9), 2019-02-28
Supplement: 41598_2019_39430_MOESM1_ESM.pdf [file 41598_2019_39430_MOESM1_ESM.pdf]

## **The kidney anion exchanger 1 affects tight junction properties via claudin-4**

Rawad Lashhab\*, Alina C. Rumley\*, Denis Arutyunov\*, Midhat Rizvi\*, Charlotte You\*, Henrik Dimke<sup>§</sup>, Nicolas Touret<sup>&</sup>, Richard Zimmermann<sup>#</sup>, Martin Jung<sup>#</sup>, Xing-Zhen Chen\*, Todd Alexander\* & Emmanuelle Cordat\*<sup>¶</sup>

### **Supplementary Information**

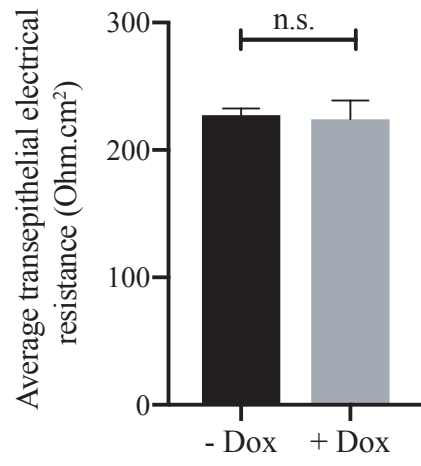

**Supplementary Figure. Doxycycline incubation does not alter transepithelial electrical resistance.** Non-infected polarized mIMCD3 cells were kept un-induced or induced for 24 hours with doxycycline and the Ussing chamber experiments were performed as described in the Methods section. Error bars correspond to means  $\pm$  SEM, n=3-4, there was no significant (n.s.) difference between - Dox and + Dox conditions.
